# Supplementary material for: The Use of a Digital Brix Refractometer to Estimate Cheese-Making Constituents in Ewes’ Milk
Source: Preprints.org preprint supplement (doi:10.20944/preprints202309.0354.v1), 2023-09-06
Supplement: Supplementary file 1 [file supplementary]

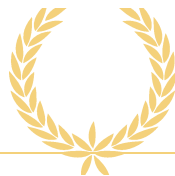

We certify that the following article

## Use of digital Brix refractometer to estimate cheese-making constituents in ewes' milk

Maria Luisa Scatassa

has undergone English language editing by MDPI. The text has been checked for correct use of grammar and common technical terms, and edited to a level suitable for reporting research in a scholarly journal.

MDPI uses experienced, native English speaking editors. Full details of the editing service can be found at

► <https://www.mdpi.com/authors/english>.

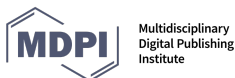

Basel, Switzerland

August 2023

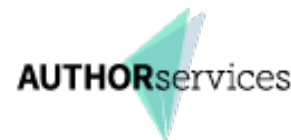

english-69452
